# Supplementary material
Source: publisher site journal article supplement (https://www.dovepress.com/article/597422)
Supplement: Supplementary file 1 [file 597422%20Revised%20Supplementary%20Material.docx]

**Table S1.** Comparison of baseline characteristics between the MIMIC-IV and eICU-CRD cohorts

| **Variable** | **eICU-CRD (n=3605)** | **MIMIC-IV (n=1890)** | **SMD** |
| --- | --- | --- | --- |
| **Age (years)** | 61.50 ± 15.71 | 63.69 ± 16.58 | 0.135 |
| **Sex, n (%)** |  |  | 0.029 |
| Male | 2154 (59.82) | 1102 (58.26) |  |
| Female | 1451 (40.18) | 788 (41.74) |  |
| **BMI** | 29.32 ± 7.89 | 29.07 ± 7.50 | 0.033 |
| **Race, n (%)** |  |  | 0.633 |
| White | 2839 (78.83) | 1002 (53.02) |  |
| Black | 338 (9.37) | 182 (9.63) |  |
| Asian | 30 (0.79) | 55 (2.91) |  |
| Other | 398 (11.01) | 651 (34.44) |  |
| **Comorbidities, n (%)** |  |  |  |
| Hypertension | 456 (12.56) | 1289 (68.16) | 1.373 |
| Sepsis | 1051 (29.22) | 739 (39.09) | 0.211 |
| History of CAD | 388 (10.78) | 613 (32.41) | 0.546 |
| Diabetes mellitus | 365 (10.08) | 567 (30.03) | 0.512 |
| COPD | 393 (10.91) | 211 (11.18) | 0.008 |
| History of Stroke | 335 (9.28) | 236 (12.53) | 0.103 |
| Arrhythmia | 719 (19.92) | 758 (40.06) | 0.451 |
| **Concomitant medications, n (%)** |  |  |  |
| Analgesics | 2185 (60.61) | 1826 (96.61) | 0.977 |
| Other sedatives | 1942 (53.92) | 1512 (80.02) | 0.578 |
| Antihypertensive agents | 1473 (40.86) | 1602 (84.78) | 1.020 |
| β-blockers | 1057 (29.31) | 1297 (68.57) | 0.855 |
| Vasoactive agents | 1043 (28.89) | 1542 (81.61) | 1.248 |
| **Propofol rate category, n (%)** |  |  | 1.586 |
| ≤0.19 mg/kg/h | 1276 (35.40) | 98 (5.19) |  |
| 0.20–0.41 mg/kg/h | 1244 (34.47) | 130 (6.88) |  |
| 0.42–1.17 mg/kg/h | 765 (21.22) | 608 (32.17) |  |
| 1.18–11.20 mg/kg/h | 320 (8.91) | 1054 (55.77) |  |
| **Duration of propofol infusion (hours)** | 144.91 ± 122.16 | 163.43 ± 142.31 | 0.140 |
| **CrCl category, n (%)** |  |  | 0.023 |
| ≥90 mL/min | 1439 (39.91) | 763 (40.41) |  |
| 30–89 mL/min | 1704 (47.32) | 899 (47.49) |  |
| <30 mL/min | 462 (12.77) | 228 (12.10) |  |
| **APS III score** | 78.13 ± 28.86 | 54.05 ± 23.83 | 0.910 |
| **CCI** | 4.03 ± 2.27 | 4.62 ± 2.89 | 0.226 |
| **Heart rate (bpm)** | 96.36 ± 22.64 | 89.77 ± 20.87 | 0.303 |
| **SpO₂ (%)** | 96.46 ± 5.02 | 96.83 ± 4.57 | 0.079 |
| **MAP (mmHg)** | 86.74 ± 21.72 | 85.18 ± 19.95 | 0.075 |

**Table S2.** Baseline characteristics of the Nanjing Drum Tower Hospital cohort

| **Variable** | **Pro (n=224)** | **Pro+Dex (n=507)** | **SMD** |  |
| --- | --- | --- | --- | --- |
| **Age (years)** | 66.21 ± 17.83 | 62.29 ± 17.80 | 0.220 |  |
| **Sex, n (%)** |  |  | 0.047 |  |
| Male | 149 (65.52) | 326 (64.30) |  |  |
| Female | 75 (34.48) | 181 (35.70) |  |  |
| **BMI** | 23.55 ± 4.62 | 22.95 ± 4.49 | 0.131 |  |
| **Comorbidities, n (%)** |  |  |  |  |
| Hypertension | 81 (36.16) | 199 (39.25) | 0.064 |  |
| Sepsis | 14 (6.25) | 235 (46.35) | 1.023 |  |
| History of CAD | 22 (9.82) | 49 (9.66) | 0.005 |  |
| Diabetes mellitus | 38 (16.96) | 101 (19.92) | 0.076 |  |
| COPD | 186 (83.04) | 475 (93.69) | 0.337 |  |
| Arrhythmia | 35 (15.63) | 71 (14.00) | 0.046 |  |
| History of Stroke | 70 (31.25) | 99 (19.53) | 0.272 |  |
| **Concomitant medications, n (%)** |  |  |  |  |
| Analgesics | 180 (80.36) | 489 (96.45) | 0.519 |  |
| Other sedatives | 63 (28.12) | 259 (51.08) | 0.483 |  |
| Antihypertensive agents | 92 (41.07) | 139 (27.42) | 0.291 |  |
| β-blockers | 32 (14.29) | 139 (27.42) | 0.328 |  |
| Vasoactive agents | 191 (85.27) | 447 (88.17) | 0.085 |  |
| **Propofol rate category, n (%)** |  |  |  |  |
| 0.08–0.43 mg/kg/h | 26 (11.61) | 171 (33.73) | 0.936 |  |
| 0.44–0.60 mg/kg/h | 80 (35.71) | 90 (17.75) |  |  |
| 0.61–0.78 mg/kg/h | 87 (38.84) | 75 (14.79) |  |  |
| 0.79–12.29 mg/kg/h | 31 (13.84) | 171 (33.73) |  |  |
| **CrCl category, n (%)** |  |  |  |  |
| ≥90 mL/min | | 79 (35.27) | 192 (37.87) | 0.130 |  |
| 30–89 mL/min | | 97 (43.30) | 232 (45.76) |  |  |
| <30 mL/min | 48 (21.43) | 83 (16.37) |  |  |
| **APS III score** | 67.63 ± 39.55 | 59.40 ± 36.74 | 0.216 |  |
| **CCI** | 4.52 ± 2.41 | 4.15 ± 2.37 | 0.153 |  |
| **Heart rate (bpm)** | 99.21 ± 26.04 | 101.44 ± 25.74 | 0.086 |  |
| **SpO₂ (%)** | 92.57 ± 2.74 | 91.80 ± 2.60 | 0.290 |  |
| **MAP (mmHg)** | 88.59 ± 16.17 | 90.21 ± 16.50 | 0.099 |  |

**Table S3.** Fixed-effects estimates from the linear mixed-effects model evaluating the association between the two groups and MAP over time

| **Variable** | **Estimate** | **Std. Error** | **t value** | **P value** |
| --- | --- | --- | --- | --- |
| Sedation: Pro+Dex | -5.520 | 0.734 | -7.569 | <0.001 |
| Time spline 1 | 3.367 | 0.563 | 5.984 | <0.001 |
| Time spline 2 | 4.243 | 0.827 | 5.132 | <0.001 |
| Time spline 3 | 3.002 | 0.544 | 5.514 | <0.001 |
| Sedation × Time spline 1 | -2.962 | 0.970 | -3.053 | 0.002 |
| Sedation × Time spline 2 | 1.359 | 1.383 | 0.983 | 0.326 |
| Sedation × Time spline 3 | -1.364 | 0.951 | -1.434 | 0.152 |

**Table S4.** Fixed-effects estimates from the linear mixed-effects model evaluating the association between the two groups and SpO₂ over time

| **Variable** | **Estimate** | **Std. Error** | **t value** | **P value** |
| --- | --- | --- | --- | --- |
| Sedation: Pro+Dex | -0.899 | 0.166 | -5.405 | <0.001 |
| Time spline 1 | -0.516 | 0.085 | -6.091 | <0.001 |
| Time spline 2 | -1.374 | 0.140 | -9.840 | <0.001 |
| Time spline 3 | -0.521 | 0.110 | -4.730 | <0.001 |
| Sedation × Time spline 1 | 0.524 | 0.222 | 2.362 | 0.018 |
| Sedation × Time spline 2 | 1.560 | 0.364 | 4.283 | <0.001 |
| Sedation × Time spline 3 | 0.595 | 0.261 | 2.277 | 0.023 |

**Table S5.** Fixed-effects estimates from the linear mixed-effects model evaluating the association between the two groups and heart rate over time

| **Variable** | **Estimate** | **Std. Error** | **t value** | **P value** |
| --- | --- | --- | --- | --- |
| Sedation: Pro+Dex | -4.398 | 0.695 | -6.33 | <0.001 |
| Time spline 1 | -0.817 | 0.364 | -2.248 | 0.025 |
| Time spline 2 | -0.951 | 0.512 | -1.857 | 0.063 |
| Time spline 3 | -0.041 | 0.364 | -0.114 | 0.909 |
| Sedation × Time spline 1 | 3.213 | 0.958 | 3.355 | <0.001 |
| Sedation × Time spline 2 | 2.726 | 1.347 | 2.023 | 0.043 |
| Sedation × Time spline 3 | 2.129 | 0.911 | 2.338 | 0.019 |

**Table S6.** Baseline characteristics between the Pro and Pro+Dex groups after PSM

| **Variable** | **Pro (n=1324)** | **Pro+Dex (n=716)** | **SMD** |
| --- | --- | --- | --- |
| **Age (years)** | 57.71 ± 16.84 | 57.51 ± 15.20 | 0.013 |
| **Sex, n (%)** |  |  | 0.016 |
| Male | 874 (66.01) | 478 (66.76) |  |
| Female | 450 (33.99) | 238 (33.24) |  |
| **BMI** | 29.09 ± 7.80 | 28.98 ± 7.08 | 0.015 |
| **Race, n (%)** |  |  | 0.092 |
| White | 906 (68.42) | 514 (71.79) |  |
| Black | 116 (8.76) | 52 (7.26) |  |
| Asian | 29 (2.19) | 10 (1.40) |  |
| Other | 273 (20.62) | 140 (19.55) |  |
| **Comorbidities, n (%)** |  |  |  |
| Hypertension | 365 (27.57) | 200 (27.93) | 0.008 |
| Sepsis | 473 (35.73) | 256 (35.75) | 0.001 |
| History of CAD | 220 (16.62) | 123 (17.19) | 0.015 |
| Diabetes mellitus | 168 (12.69) | 87 (12.15) | 0.016 |
| COPD | 154 (11.63) | 77 (10.75) | 0.028 |
| Arrhythmia | 331 (25.00) | 182 (25.42) | 0.010 |
| History of Stroke | 125 (9.44) | 63 (8.80) | 0.022 |
| **Concomitant medications, n (%)** |  |  |  |
| Analgesics | 1098 (82.93) | 659 (86.14) | 0.498 |
| Other sedatives | 775 (58.53) | 616 (81.83) | 0.326 |
| Antihypertensive agents | 853 (64.43) | 523 (68.37) | 0.258 |
| β-blockers | 632 (47.73) | 390 (50.98) | 0.183 |
| Vasoactive agents | 606 (45.77) | 448 (58.36) | 0.306 |
| **Propofol rate category, n (%)** |  |  | 0.056 |
| ≤0.19 mg/kg/h | 305 (23.04) | 178 (24.86) |  |
| 0.20–0.41 mg/kg/h | 358 (27.04) | 180 (25.14) |  |
| 0.42–1.17 mg/kg/h | 241 (18.20) | 126 (17.60) |  |
| 1.18–11.20 mg/kg/h | 420 (31.72) | 232 (32.40) |  |
| **Duration of propofol infusion (hours)** | 185.83 ± 148.92 | 210.08 ± 121.88 | 0.178 |
| **CrCl category, n (%)** |  |  | 0.035 |
| ≥90 mL/min | 622 (46.98) | 324 (45.25) |  |
| 30–90 mL/min | 564 (42.60) | 316 (44.13) |  |
| <30 mL/min | 138 (10.42) | 76 (10.61) |  |
| **APS III score** | 68.82 ± 29.25 | 68.65 ± 30.35 | 0.006 |
| **CCI** | 3.71 ± 2.44 | 3.67 ± 2.54 | 0.018 |
| **Heart rate (bpm)** | 96.22 ± 22.17 | 96.35 ± 22.29 | 0.006 |
| **SpO₂** **(%)** | 96.69 ± 4.63 | 96.59 ± 4.12 | 0.024 |
| **MAP** **(mmHg)** | 86.13 ± 21.33 | 86.55 ± 20.45 | 0.020 |

**Table S7.** Propensity score–matched, database-stratified, and external validation analyses of mortality and delirium (Pro+Dex vs Pro)

| Panel | Outcome | Cohort / Analysis | Effect (HR or OR, 95% CI) | P value |
| --- | --- | --- | --- | --- |
| **A. Sensitivity analysis (PSM)** | 28-day mortality | PSM | 0.47 (0.38–0.60) | <0.001 |
|  | Delirium | PSM | 0.39 (0.20–0.51) | <0.001 |
|  | ICU mortality | Overall (pooled) | 0.35 (0.28–0.44) | <0.001 |
| **B. Stratified analysis by database** | 28-day mortality | MIMIC-IV | 0.39 (0.28–0.55) | <0.001 |
|  |  | eICU-CRD | 0.51 (0.38–0.68) | <0.001 |
|  | Delirium | MIMIC-IV | 0.27 (0.19–0.37) | <0.001 |
|  |  | eICU-CRD | 0.91 (0.50–1.54) | 0.725 |
| **C. External validation** | 28-day mortality | Drum Tower Hospital | 0.56 (0.34–0.93) | 0.024 |
|  | Delirium | Drum Tower Hospital | 0.79 (0.46–1.38) | 0.416 |
